# Supplementary material
Source: PubMed Central journal article supplement (PMC3995136)
Supplement: NIHMS548376-supplement-Supp_Fig_S1.pdf [file NIHMS548376-supplement-Supp_Fig_S1.pdf]

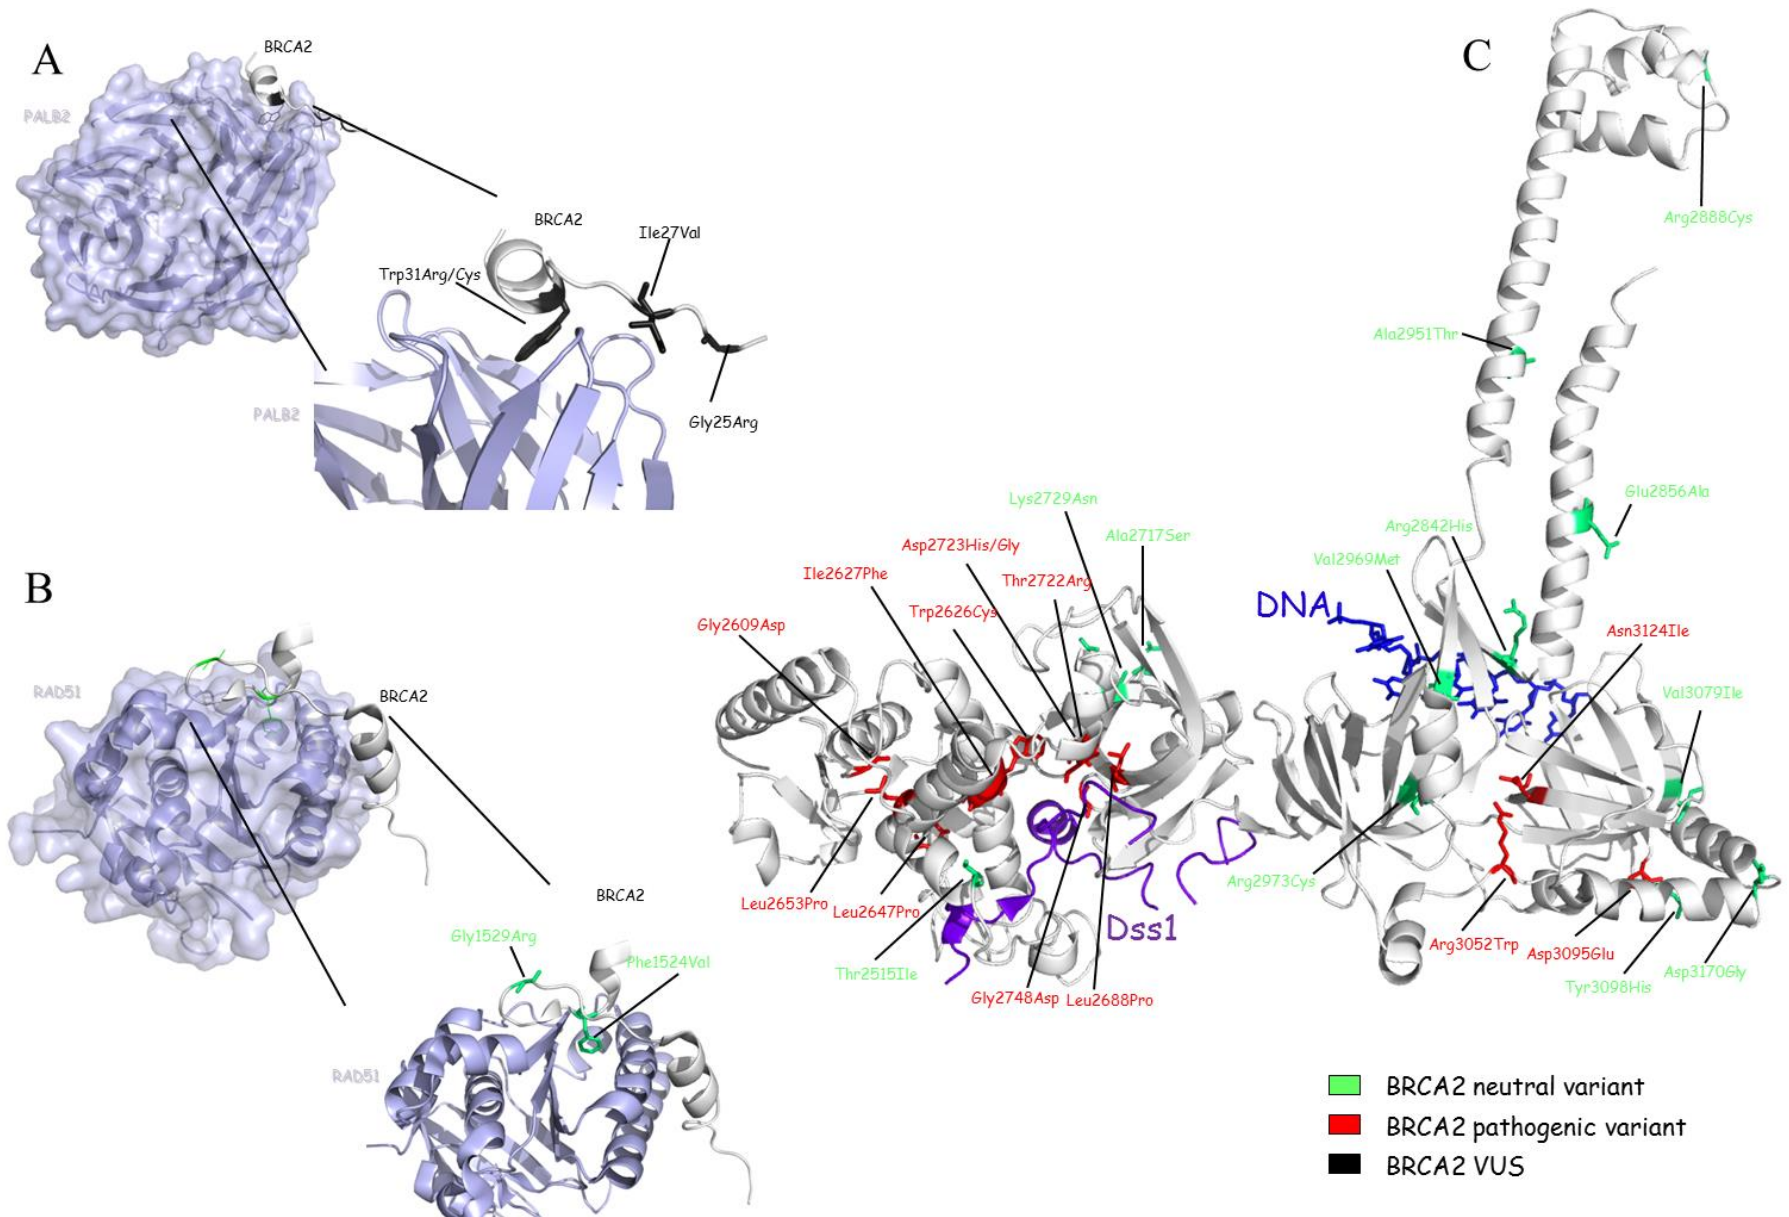

**Supp. Figure S1.** Representation of the 3D structure of BRCA2 domains containing classified variants. **A:** N-terminal part of BRCA2 (exon 3). Ribbon representation of the BRCA2-PALB2 complex (pdb ID: 3EU7). PALB2 is colored in light gray/blue. N-terminal BRCA2 residues listed in Table 2 are shown in black. **B:** BRC4 of BRCA2. Ribbon representation of the BRCA2-RAD51 complex (pdb ID: 3N0W). RAD51 is colored in light gray/blue. BRCA2 BRC4 residues corresponding to variants that have been classified and are listed in Table 1 are shown in green (Class 1/2 variants). **C:** C-terminal domain of BRCA2. Ribbon representation of the BRCA2 C-terminal domain (pdb ID: 1MIU and 1MJE) and the interaction with DSS1 and DNA. C-terminal residues corresponding to variants that have been classified and are listed in Table 1 are shown in red (Class 4/5 mutations) and green (Class 1 variants).
